# Supplementary material for: Discrimination of Bacillus cereus Group Members by MALDI-TOF Mass Spectrometry
Source: MDPI journal article supplement (doi:10.3390/microorganisms9061202), 2021-06-02
Supplement: s1 [file s1]

**Table S1.** List of *Bacillus cereus* group strains used in this study.

| Code (ID) | Origin (Source)                                                 | Bacterial strains                                           |
|-----------|-----------------------------------------------------------------|-------------------------------------------------------------|
| BA002     | Sheep (anthrax outbreak in Apulia region of 1993)               | <i>B. anthracis</i> (pXO1 <sup>+</sup> /pXO2 <sup>+</sup> ) |
| BA004     | Goat (anthrax outbreak in Apulia region of 1993)                | <i>B. anthracis</i> (pXO1 <sup>+</sup> /pXO2 <sup>+</sup> ) |
| BA005     | Sheep (anthrax outbreak in Apulia region of 1993)               | <i>B. anthracis</i> (pXO1 <sup>+</sup> /pXO2 <sup>+</sup> ) |
| BA008     | Sheep (anthrax outbreak in Sicily region of 1996)               | <i>B. anthracis</i> (pXO1 <sup>+</sup> /pXO2 <sup>+</sup> ) |
| BA010     | Donkey (anthrax outbreak in Sicily region of 1996)              | <i>B. anthracis</i> (pXO1 <sup>+</sup> /pXO2 <sup>+</sup> ) |
| BA019     | Cattle (anthrax outbreak in Basilicata region of 1999)          | <i>B. anthracis</i> (pXO1 <sup>+</sup> /pXO2 <sup>+</sup> ) |
| BA021     | 34F2 Sterne vaccine strain                                      | <i>B. anthracis</i> (pXO1 <sup>+</sup> /pXO2 <sup>-</sup> ) |
| BA022     | Sheep (anthrax outbreak in Apulia region of 1984)               | <i>B. anthracis</i> (pXO1 <sup>+</sup> /pXO2 <sup>+</sup> ) |
| BA031     | Sheep (anthrax outbreak in Apulia region of 1984)               | <i>B. anthracis</i> (pXO1 <sup>+</sup> /pXO2 <sup>+</sup> ) |
| BA045     | Sheep (anthrax outbreak in Apulia region of 2000)               | <i>B. anthracis</i> (pXO1 <sup>+</sup> /pXO2 <sup>+</sup> ) |
| BA048     | Cattle (anthrax outbreak in Sardinia region of 2000)            | <i>B. anthracis</i> (pXO1 <sup>+</sup> /pXO2 <sup>+</sup> ) |
| BA049     | Cattle (anthrax outbreak in Veneto region of 1992)              | <i>B. anthracis</i> (pXO1 <sup>+</sup> /pXO2 <sup>+</sup> ) |
| BA051     | Human (anthrax outbreak in Lazio region of 1999)                | <i>B. anthracis</i> (pXO1 <sup>+</sup> /pXO2 <sup>+</sup> ) |
| BA052     | Sheep (anthrax outbreak in Lazio region of 1999)                | <i>B. anthracis</i> (pXO1 <sup>+</sup> /pXO2 <sup>+</sup> ) |
| BA053     | Cattle (anthrax outbreak in Tuscany region of 1999)             | <i>B. anthracis</i> (pXO1 <sup>+</sup> /pXO2 <sup>+</sup> ) |
| BA058     | Sheep (anthrax outbreak in Apulia region of 2001)               | <i>B. anthracis</i> (pXO1 <sup>+</sup> /pXO2 <sup>+</sup> ) |
| BA063     | Sheep (anthrax outbreak in Basilicata region of 2002)           | <i>B. anthracis</i> (pXO1 <sup>+</sup> /pXO2 <sup>+</sup> ) |
| BA065     | Goat (anthrax outbreak in Calabria region of 2002)              | <i>B. anthracis</i> (pXO1 <sup>+</sup> /pXO2 <sup>+</sup> ) |
| BA103     | Deer (anthrax outbreak in Basilicata region of 2004)            | <i>B. anthracis</i> (pXO1 <sup>+</sup> /pXO2 <sup>+</sup> ) |
| BA105     | Soil (cursed fields in Basilicata region -2004)                 | <i>B. anthracis</i> (pXO1 <sup>+</sup> /pXO2 <sup>+</sup> ) |
| BA120     | Swine (anthrax outbreak in Basilicata region of 2004)           | <i>B. anthracis</i> (pXO1 <sup>+</sup> /pXO2 <sup>+</sup> ) |
| BA124     | Goat (anthrax outbreak in Sardinia region of 1996)              | <i>B. anthracis</i> (pXO1 <sup>+</sup> /pXO2 <sup>+</sup> ) |
| BA132     | Goat (anthrax outbreak in Apulia region of 2005)                | <i>B. anthracis</i> (pXO1 <sup>+</sup> /pXO2 <sup>+</sup> ) |
| BA135     | Cattle (anthrax outbreak in Sicily region of 2005)              | <i>B. anthracis</i> (pXO1 <sup>+</sup> /pXO2 <sup>+</sup> ) |
| BA140     | Cattle (anthrax outbreak in Basilicata region of 2006)          | <i>B. anthracis</i> (pXO1 <sup>+</sup> /pXO2 <sup>+</sup> ) |
| BA145     | Cattle (anthrax outbreak in Tuscany region of 2008)             | <i>B. anthracis</i> (pXO1 <sup>+</sup> /pXO2 <sup>+</sup> ) |
| BA152     | Cattle (anthrax outbreak in Umbria region of 2009)              | <i>B. anthracis</i> (pXO1 <sup>+</sup> /pXO2 <sup>+</sup> ) |
| BA156     | Soil (cursed fields in Tuscany region -2009)                    | <i>B. anthracis</i> (pXO1 <sup>+</sup> /pXO2 <sup>+</sup> ) |
| BA174     | Cattle (anthrax outbreak in Sicily region of 2009)              | <i>B. anthracis</i> (pXO1 <sup>+</sup> /pXO2 <sup>+</sup> ) |
| BA175     | Sheep (anthrax outbreak in Basilicata region of 2009)           | <i>B. anthracis</i> (pXO1 <sup>+</sup> /pXO2 <sup>+</sup> ) |
| BA180     | Cattle (anthrax outbreak in Sicily region of 2009)              | <i>B. anthracis</i> (pXO1 <sup>+</sup> /pXO2 <sup>+</sup> ) |
| BA181     | Sheep (anthrax outbreak in Campania region of 2009)             | <i>B. anthracis</i> (pXO1 <sup>+</sup> /pXO2 <sup>+</sup> ) |
| BA182     | Cattle (anthrax outbreak in Basilicata region of 2009)          | <i>B. anthracis</i> (pXO1 <sup>+</sup> /pXO2 <sup>+</sup> ) |
| BA183     | Cattle (anthrax outbreak in Lombardia region of 1989)           | <i>B. anthracis</i> (pXO1 <sup>+</sup> /pXO2 <sup>+</sup> ) |
| BA184     | Cattle (anthrax outbreak in Apulia region of 2009)              | <i>B. anthracis</i> (pXO1 <sup>+</sup> /pXO2 <sup>+</sup> ) |
| BA187     | Cattle (anthrax outbreak in Trentino Alto Adige region of 2006) | <i>B. anthracis</i> (pXO1 <sup>+</sup> /pXO2 <sup>+</sup> ) |
| BA188     | Cattle (anthrax outbreak in Veneto region of 2007)              | <i>B. anthracis</i> (pXO1 <sup>+</sup> /pXO2 <sup>+</sup> ) |
| BA300     | Equine (anthrax outbreak in Campania region of 2011)            | <i>B. anthracis</i> (pXO1 <sup>+</sup> /pXO2 <sup>+</sup> ) |
| BA308     | Sheep (anthrax outbreak in Basilicata region of 2011)           | <i>B. anthracis</i> (pXO1 <sup>+</sup> /pXO2 <sup>+</sup> ) |
| BA421     | Cattle (anthrax outbreak in Sicily region of 2012)              | <i>B. anthracis</i> (pXO1 <sup>+</sup> /pXO2 <sup>+</sup> ) |
| BA430     | Human (anthrax outbreak in Basilicata region of 2012)           | <i>B. anthracis</i> (pXO1 <sup>+</sup> /pXO2 <sup>+</sup> ) |
| BA434     | Soil (cursed fields in Basilicata region - 2012)                | <i>B. anthracis</i> (pXO1 <sup>+</sup> /pXO2 <sup>+</sup> ) |
| BA439     | Cattle (anthrax outbreak in Sicily region of 2012)              | <i>B. anthracis</i> (pXO1 <sup>+</sup> /pXO2 <sup>+</sup> ) |
| BA441     | Cattle (anthrax outbreak in Tuscany region of 2012)             | <i>B. anthracis</i> (pXO1 <sup>+</sup> /pXO2 <sup>+</sup> ) |

|        |                                                        |                                                             |
|--------|--------------------------------------------------------|-------------------------------------------------------------|
| BA651  | Soil (cursed fields in Basilicata region - 2014)       | <i>B. anthracis</i> (pXO1 <sup>+</sup> /pXO2 <sup>+</sup> ) |
| BA661  | Cattle (anthrax outbreak in Basilicata region of 2014) | <i>B. anthracis</i> (pXO1 <sup>+</sup> /pXO2 <sup>+</sup> ) |
| BA662  | Cattle (anthrax outbreak in Sicily region of 2014)     | <i>B. anthracis</i> (pXO1 <sup>+</sup> /pXO2 <sup>+</sup> ) |
| BA718  | Goat (anthrax outbreak in Abruzzo region of 2016)      | <i>B. anthracis</i> (pXO1 <sup>+</sup> /pXO2 <sup>+</sup> ) |
| BA719  | Sheep (anthrax outbreak in Lazio region of 2016)       | <i>B. anthracis</i> (pXO1 <sup>+</sup> /pXO2 <sup>+</sup> ) |
| BA722  | Cattle (anthrax outbreak in Sicily region of 2016)     | <i>B. anthracis</i> (pXO1 <sup>+</sup> /pXO2 <sup>+</sup> ) |
| BA726  | Cattle (anthrax outbreak in Lazio region of 2017)      | <i>B. anthracis</i> (pXO1 <sup>+</sup> /pXO2 <sup>+</sup> ) |
| BA729  | Sheep (anthrax outbreak in Campania region of 2017)    | <i>B. anthracis</i> (pXO1 <sup>+</sup> /pXO2 <sup>+</sup> ) |
| BA730  | Cattle (anthrax outbreak in Lazio region of 2018)      | <i>B. anthracis</i> (pXO1 <sup>+</sup> /pXO2 <sup>+</sup> ) |
| BA733  | Cattle (anthrax outbreak in Sicily region of 2018)     | <i>B. anthracis</i> (pXO1 <sup>+</sup> /pXO2 <sup>+</sup> ) |
| BA741  | Cattle (anthrax outbreak in Apulia region of 2019)     | <i>B. anthracis</i> (pXO1 <sup>+</sup> /pXO2 <sup>+</sup> ) |
| BA742  | Cattle (anthrax outbreak in Calabria region of 2020)   | <i>B. anthracis</i> (pXO1 <sup>+</sup> /pXO2 <sup>+</sup> ) |
| BA743  | Goat (anthrax outbreak in Campania region of 2020)     | <i>B. anthracis</i> (pXO1 <sup>+</sup> /pXO2 <sup>+</sup> ) |
| BCG126 | Mozzarella                                             | <i>B. cereus</i>                                            |
| BCG128 | Mozzarella                                             | <i>B. cereus</i>                                            |
| BCG129 | Mozzarella                                             | <i>B. cereus</i>                                            |
| BCG131 | Mozzarella                                             | <i>B. cereus</i>                                            |
| BCG132 | Buffalo mozzarella                                     | <i>B. cereus</i>                                            |
| BCG134 | Burrata                                                | <i>B. cereus</i>                                            |
| BCG135 | Raw cow's milk                                         | <i>B. cereus</i>                                            |
| BCG136 | Raw cow's milk                                         | <i>B. cereus</i>                                            |
| BCG137 | Pasteurized milk                                       | <i>B. cereus</i>                                            |
| BCG139 | Mozzarella                                             | <i>B. cereus</i>                                            |
| BCG145 | Bovine meat                                            | <i>B. cereus</i>                                            |
| BCG146 | Butter                                                 | <i>B. cereus</i>                                            |
| BCG148 | Mozzarella                                             | <i>B. cereus</i>                                            |
| BCG149 | Mozzarella                                             | <i>B. cereus</i>                                            |
| BCG150 | Mozzarella                                             | <i>B. cereus</i>                                            |
| BCG152 | Yogurt                                                 | <i>B. cereus</i>                                            |
| BCG153 | Wurstel                                                | <i>B. cereus</i>                                            |
| BCG157 | Fresh cheese                                           | <i>B. cereus</i>                                            |
| BCG164 | Swordfish with olives                                  | <i>B. cereus</i>                                            |
| BCG165 | Butter                                                 | <i>B. cereus</i>                                            |
| BCG169 | Common wheat flour                                     | <i>B. cereus</i>                                            |
| BCG171 | Mozzarella                                             | <i>B. cereus</i>                                            |
| BCG174 | Egg pasta (pappardelle)                                | <i>B. cereus</i>                                            |
| BCG178 | Bulk milk                                              | <i>B. cereus</i>                                            |
| BCG180 | Ice cream                                              | <i>B. cereus</i>                                            |
| BCG183 | Goat cheese                                            | <i>B. cereus</i>                                            |
| BCG184 | Rocket salad                                           | <i>B. cereus</i>                                            |
| BCG191 | Mozzarella                                             | <i>B. cereus</i>                                            |
| BCG192 | Caciocavallo                                           | <i>B. cereus</i>                                            |
| BCG194 | Caciocavallo                                           | <i>B. cereus</i>                                            |
| BCG197 | Mozzarella                                             | <i>B. cereus</i>                                            |
| BCG198 | Mozzarella                                             | <i>B. cereus</i>                                            |
| BCG199 | Mozzarella                                             | <i>B. cereus</i>                                            |
| BCG200 | Aged cheese                                            | <i>B. cereus</i>                                            |
| BCG201 | Ricotta                                                | <i>B. cereus</i>                                            |
| BCG218 | Pasta filata cheese                                    | <i>B. cereus</i>                                            |

|         |                               |                              |
|---------|-------------------------------|------------------------------|
| BCG222  | Scamorza                      | <i>B. cereus</i>             |
| BCG235  | Artichokes                    | <i>B. cereus</i>             |
| BCG243  | Salad                         | <i>B. cereus</i>             |
| BCG249  | Packaged ice cream cone       | <i>B. cereus</i>             |
| BCG250  | Industrial biscuits           | <i>B. cereus</i>             |
| BCG251  | Industrial biscuits           | <i>B. cereus</i>             |
| BCG253  | Industrial biscuits           | <i>B. cereus</i>             |
| BCG254  | Industrial biscuits           | <i>B. cereus</i>             |
| BCG255  | Industrial chocolate biscuits | <i>B. cereus</i>             |
| BCG263  | Panettone                     | <i>B. cereus</i>             |
| BCG265  | Truffle                       | <i>B. cereus</i>             |
| BCG294A | Mozzarella                    | <i>B. cereus</i>             |
| BCG337A | Artichokes                    | <i>B. cereus</i>             |
| BCG020  | Food                          | <i>B. mycoides</i>           |
| BCG140  | Fresh sweet sausage           | <i>B. thuringensis</i>       |
| BCG142  | Bulk milk                     | <i>B. thuringensis</i>       |
| BCG144  | Ice cream                     | <i>B. thuringensis</i>       |
| BCG151  | Fiordilatte                   | <i>B. thuringensis</i>       |
| BCG155  | Mozzarella                    | <i>B. thuringensis</i>       |
| BCG156  | Giuncata                      | <i>B. thuringensis</i>       |
| BCG160  | Smoked cheese                 | <i>B. thuringensis</i>       |
| BCG168  | Aged cheese                   | <i>B. thuringensis</i>       |
| BCG172  | Fresh cheese                  | <i>B. thuringensis</i>       |
| BCG173  | Mozzarella                    | <i>B. thuringensis</i>       |
| BCG175  | Focaccia with smoked cheese   | <i>B. thuringensis</i>       |
| BCG176  | Ricotta                       | <i>B. thuringensis</i>       |
| BCG179  | Sandwich                      | <i>B. thuringensis</i>       |
| BCG186  | Caciotta                      | <i>B. thuringensis</i>       |
| BCG188  | Mozzarella                    | <i>B. thuringensis</i>       |
| BCG189  | Mozzarella                    | <i>B. thuringensis</i>       |
| BCG190  | Mozzarella                    | <i>B. thuringensis</i>       |
| BCG202  | Fava beans                    | <i>B. thuringensis</i>       |
| BCG203  | Finocchio                     | <i>B. thuringensis</i>       |
| BCG204  | Salad                         | <i>B. thuringensis</i>       |
| BCG220  | Caciocavallo                  | <i>B. thuringensis</i>       |
| BCG224  | Caciocavallo                  | <i>B. thuringensis</i>       |
| BCG232  | Chicory                       | <i>B. thuringensis</i>       |
| BCG242  | Green beans                   | <i>B. thuringensis</i>       |
| BCG254A | Fiordilatte                   | <i>B. thuringensis</i>       |
| BCG256  | Industrial chocolate biscuits | <i>B. thuringensis</i>       |
| BCG335A | Kale                          | <i>B. thuringensis</i>       |
| BCG130  | Mozzarella                    | <i>B. toyonensis</i>         |
| BCG159  | Mozzarella                    | <i>B. toyonensis</i>         |
| BCG185  | Mixed salad                   | <i>B. toyonensis</i>         |
| BCG225  | Mozzarella                    | <i>B. toyonensis</i>         |
| BCG233  | Rocket salad                  | <i>B. toyonensis</i>         |
| BCG237  | Salad                         | <i>B. toyonensis</i>         |
| BCG262  | Almond sweets                 | <i>B. toyonensis</i>         |
| BCG147  | Mozzarella                    | <i>B. weihenstephanensis</i> |

|         |                               |                      |
|---------|-------------------------------|----------------------|
| BCG127  | Mozzarella                    | <i>B. wiedmannii</i> |
| BCG133  | Buffalo mozzarella            | <i>B. wiedmannii</i> |
| BCG141  | Caciocavallo                  | <i>B. wiedmannii</i> |
| BCG154  | Mozzarella                    | <i>B. wiedmannii</i> |
| BCG161  | Mozzarella                    | <i>B. wiedmannii</i> |
| BCG162  | Mozzarella                    | <i>B. wiedmannii</i> |
| BCG167  | Wurstel                       | <i>B. wiedmannii</i> |
| BCG177  | Ricotta                       | <i>B. wiedmannii</i> |
| BCG182  | Scamorza                      | <i>B. wiedmannii</i> |
| BCG187  | Mozzarella                    | <i>B. wiedmannii</i> |
| BCG193  | Mozzarella                    | <i>B. wiedmannii</i> |
| BCG195  | Ricotta                       | <i>B. wiedmannii</i> |
| BCG226  | Mozzarella                    | <i>B. wiedmannii</i> |
| BCG234  | Salad                         | <i>B. wiedmannii</i> |
| BCG245  | Egg pasta (ravioli)           | <i>B. wiedmannii</i> |
| BCG248  | Surimi                        | <i>B. wiedmannii</i> |
| BCG252  | Wholemeal industrial biscuits | <i>B. wiedmannii</i> |
| BCG286A | Mozzarella                    | <i>B. wiedmannii</i> |

---
