# Supplementary figures and images for: Discrimination of Bacillus cereus Group Members by MALDI-TOF Mass Spectrometry
Source: MDPI journal article supplement (doi:10.3390/microorganisms9061202), 2021-06-02

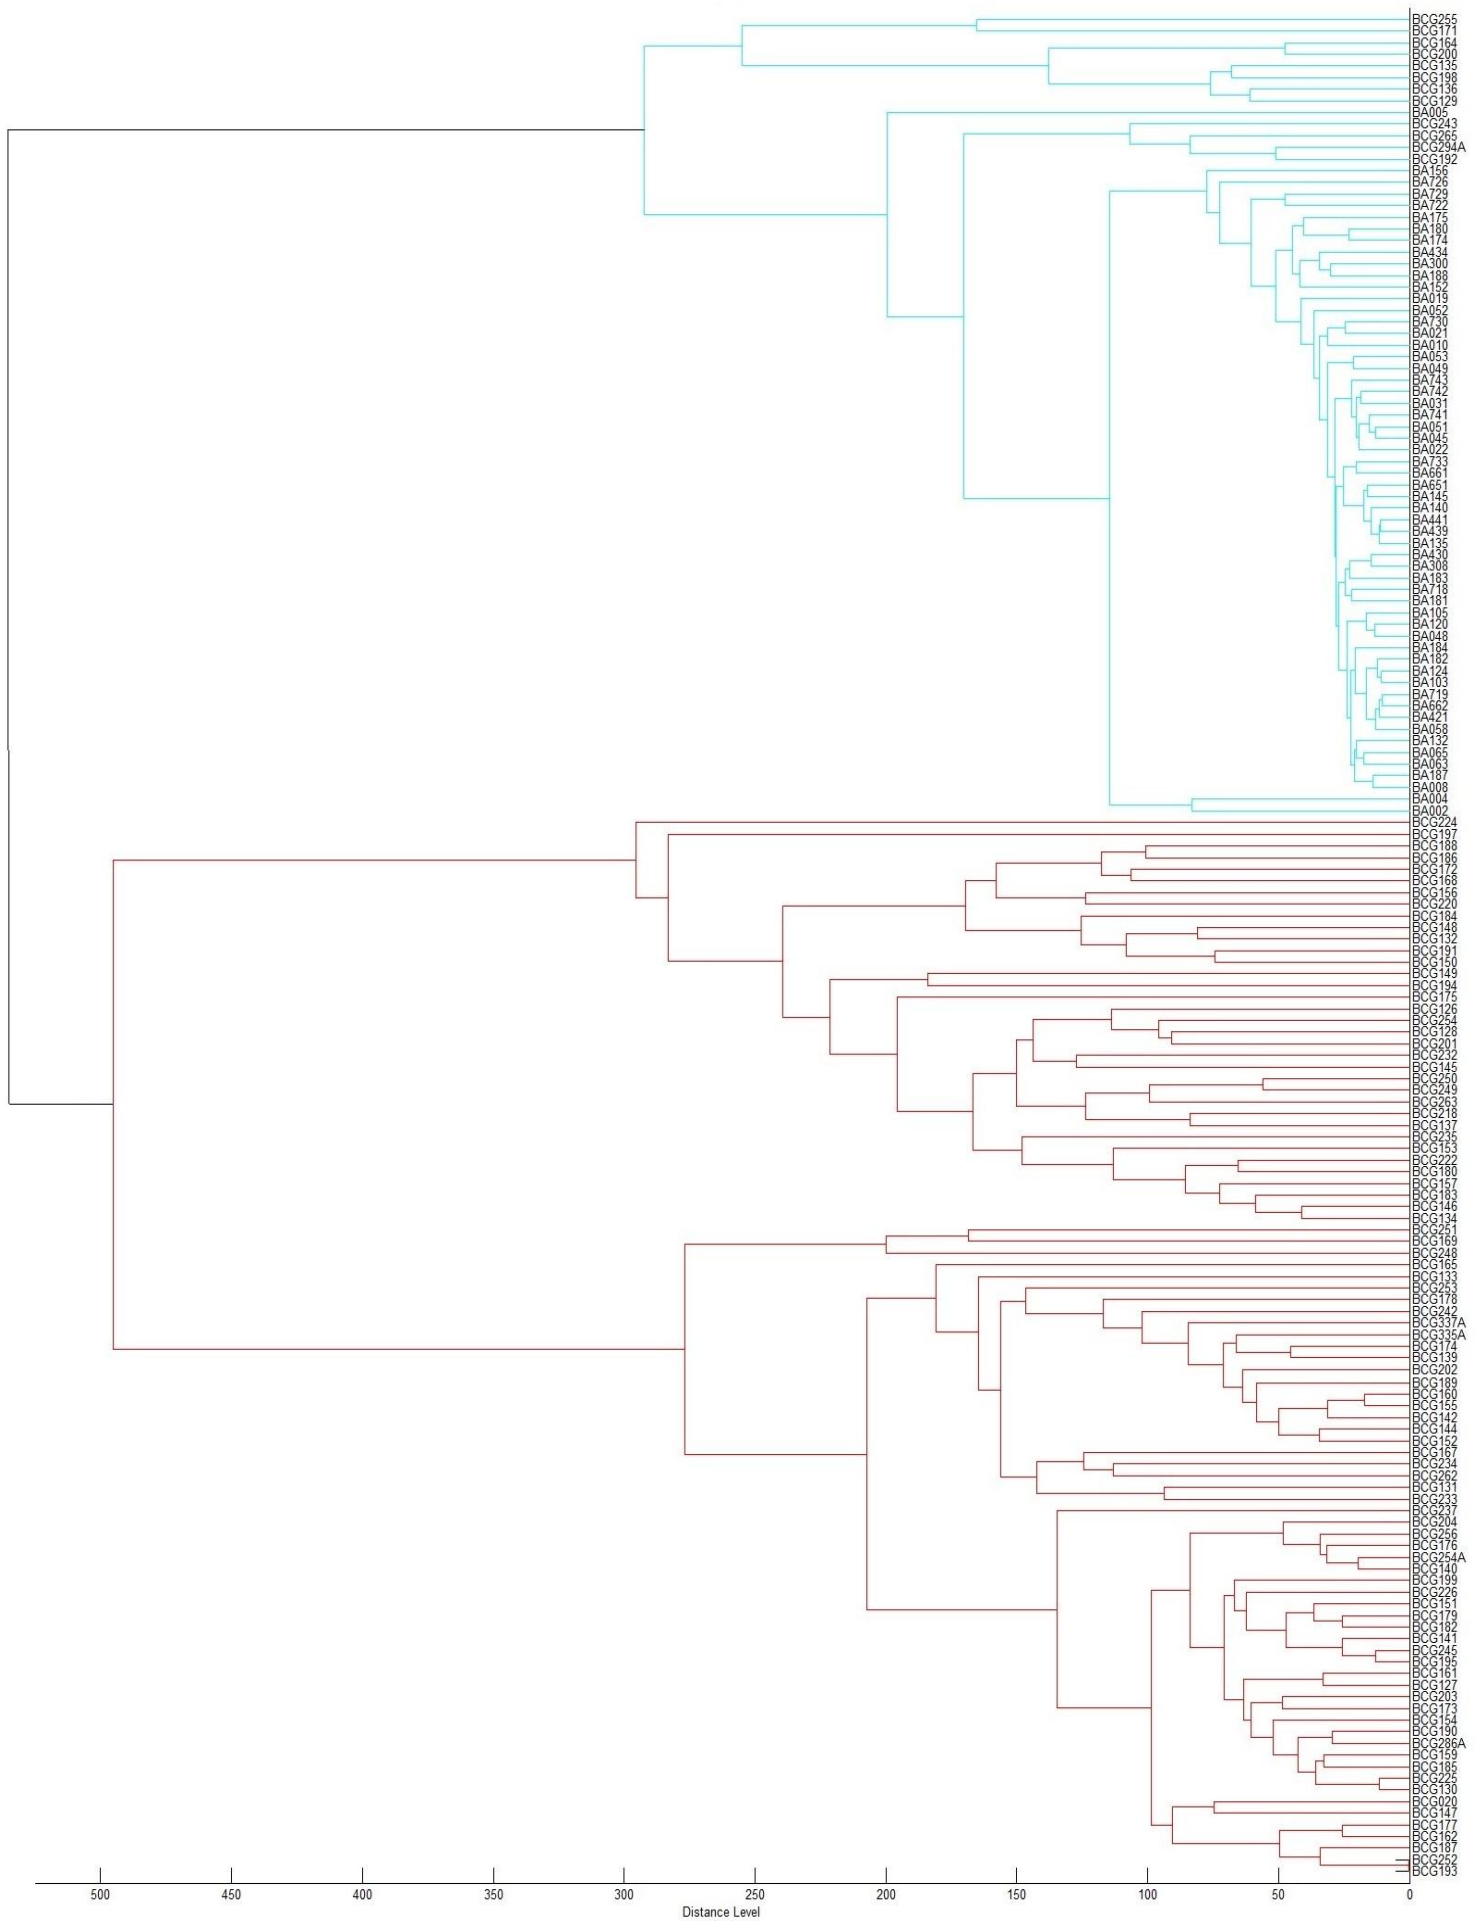

Supplement: s1 [file s1]
